# Supplementary material for: Hypoxia and Human Genome Stability: Downregulation of BRCA2 Expression in Breast Cancer Cell Lines
Source: Biomed Res Int. 2013 Sep 22;2013:746858. doi: 10.1155/2013/746858 (PMC3793298; doi:10.1155/2013/746858)
Supplement: Supplementary file 1 — Table S1: Includes the differentially expressed genes involved in DNA damage repair (DDR) pathways in breast cancer cell lines under hypoxia. The Probe ID is the code provided by Affymetrix for each gene. All showed Signal values are in logarithm scale. The Signal value of each gene, for each experimental condition, is derived from the mean of two biological replicates. The Signal is the quantitative measure of the relative abundance of a transcript. N= Normoxia; H24= Hypoxia for 24 h; H48= Hypoxia for 48 h. Fold Change >|0.5| and P< 0.05. [file 746858.f1.xlsx]

## Sheet: Foglio1
Table S1. Pattern of common DEGs involved in DNA damage repair (DDR) pathways in breast cancer cell lines under hypoxia#
Probe ID	symbol	Signal
		MCF-7			MDA-MB-231			SKBr3
		N	H24	H48	N	H24	H48	N	H24	H48
202520_s_at	MLH1	9.87318	7.787	7.82061	9.94182	7.9582	8.09	9.45107	8.25988	8.38114
204838_s_at	MLH3	6.61059	5.45536	5.37174	7.05204	4.68279	5.55247	6.8346	4.37378	4.69981
209421_at	MSH2	8.66819	7.54473	7.43377	7.85031	7.15838	8.65732	7.7768	7.13109	4.70865
210410_s_at	MSH5	6.1265	4.12261	5.06179	7.15201	6.39529	5.57052	5.2876	4.10214	3.72275
202911_at	MSH6	10.185	9.29086	9.54452	9.53833	10.2906	10.6704	8.96389	8.26942	8.12053
208021_s_at	RFC1	7.77863	7.1735	7.18437	7.99733	7.33719	8.591	4.47441	3.74366	3.1913
1053_at	RFC2	8.81766	7.45597	7.13664	7.93624	7.32133	7.29554	8.54254	7.85562	6.34707
204127_at	RFC3	10.0255	9.16693	8.90263	8.67168	8.0247	9.40878	9.66721	8.914	7.48944
204023_at	RFC4	9.58822	7.75842	7.82516	9.51598	8.56737	10.1623	9.50169	7.92644	4.75075
203210_s_at	RFC5	8.82947	7.70588	7.04127	8.06962	7.1175	8.66904	6.0906	5.07494	4.09463
213677_s_at	PMS1	7.91161	5.87252	5.22348	8.45268	6.89789	6.53829	7.30433	3.72477	3.06707
209375_at	XPC	7.53829	6.14325	6.58295	7.95129	6.9978	7.02152	7.84154	6.24673	6.64931
201528_at	RPA1	10.4007	9.76298	9.59162	9.67219	10.3348	10.73	8.84804	7.2749	6.84643
201756_at	RPA2	9.38266	8.81426	8.80239	9.28401	8.74003	9.79188	7.45759	6.6425	6.40184
221143_at	RPA4	4.35897	5.32847	5.1286	4.63932	6.5514	5.78936	3.34445	4.12946	4.02297
236139_at	POLS	5.23342	6.11089	5.93818	4.92919	7.35856	5.90684	5.08283	5.94228	6.32787
242656_at	GTF2H1	4.01078	4.67802	4.6033	4.09826	4.9546	5.00035	4.1485	5.61099	5.26361
214422_at	RAD23B	5.81814	7.14955	7.51141	5.40413	7.48667	6.94678	5.53353	7.27322	7.6069
228131_at	ERCC1	7.45673	6.15375	6.38628	8.36349	7.06187	7.75628	6.50267	5.35777	5.37646
213468_at	ERCC2	5.34286	4.31255	4.29437	7.61428	7.09878	6.91875	6.02693	5.02361	4.95544
202176_at	ERCC3	6.93758	6.13486	6.08377	6.49827	5.72365	5.65296	7.28994	6.5635	6.46512
205072_s_at	XRCC4	6.54792	5.76239	5.69365	5.61576	4.94253	6.95814	6.12583	5.41286	5.23946
208643_s_at	XRCC5	10.8913	9.42789	9.78465	10.39	9.76557	10.9377	9.76403	8.41353	7.71154
215308_at	XRCC6	3.11352	3.67936	3.64623	3.2613	3.76947	3.7719	2.76875	3.39668	3.38602
219418_at	NHEJ1	6.98484	7.50025	7.54319	6.79053	7.44881	7.51285	5.8785	6.75074	6.82372
208694_at	PRKDC	9.26879	7.75206	7.76072	8.75184	8.00347	9.43896	9.42437	8.2366	6.09824
239376_at	DCLRE1C	6.67718	5.6885	5.61658	6.23282	4.27394	5.47206	6.3062	4.75117	4.39587
222238_s_at	POLM	6.32177	5.31264	5.32457	5.83022	5.24463	5.12953	6.49165	5.67911	5.51017
227766_at	LIG4	4.80036	3.99944	4.29853	6.07306	3.83706	6.82381	4.98727	3.62297	4.31259
209349_at	RAD50	6.2892	4.89707	5.55129	6.00557	4.43224	4.68561	4.4446	3.74395	3.45691
204531_s_at	BRCA1	7.9175	6.35069	6.1795	6.32746	4.86009	4.80669	4.33216	3.56768	3.6135
214727_at	BRCA2	6.63614	4.95786	4.32713	5.386	4.20734	4.06057	3.991	2.93918	2.90423
205024_s_at	RAD51	8.30213	7.05169	6.47338	6.9586	6.41275	7.81251	7.6565	6.89053	5.52811
209849_s_at	RAD51C	11.3326	9.94047	9.3509	7.60492	5.07984	4.87425	5.29289	4.18814	3.80089
236042_at	RAD52	4.54895	3.80545	3.79642	5.77796	4.21679	5.0815	5.30213	4.70029	4.71648
239169_at	RDM1	5.52946	4.72125	4.65992	6.36483	5.68092	5.65342	4.09281	3.32229	3.12818
1552937_s_at	ATRIP	5.95063	4.91814	4.80695	5.43439	4.86255	4.82564	4.63642	3.84385	3.97514
#All showed Signal values are in logarithm scale. The Signal value of each gene, for each experimental condition, is derived from the mean of two biological replicates. Signal = Quantitative measure of the relative abundance of a transcript. N= Normoxia; H24= Hypoxia for 24h; H48= Hypoxia for 48h. Fold Change >|0.5| and *P< 0.05
